# Supplementary material for: Comparative Transcriptomic Analysis of WSSV-Challenged Penaeus vannamei with Variable Resistance Levels
Source: MDPI journal article supplement (doi:10.3390/ijms25094961), 2024-05-02
Supplement: s1 [file s1]

Supplementary Table S1. Sequencing data statistics.

| Group   | Sample    | Raw reads | Raw bases  | Clean reads | Clean bases | Q20(%) | Q30(%) | GC(%) | Mapped(%) |
|---------|-----------|-----------|------------|-------------|-------------|--------|--------|-------|-----------|
| A-0     | A-0-1     | 43844100  | 6576615000 | 43567220    | 6480817532  | 97.87  | 94.11  | 49.52 | 88.13     |
|         | A-0-2     | 37933546  | 5690031900 | 37669964    | 5597991421  | 97.93  | 94.19  | 49.29 | 89.57     |
|         | A-0-3     | 43519916  | 6527987400 | 43203516    | 6426788366  | 98.05  | 94.54  | 49.74 | 89.39     |
|         | A-0-4     | 41864274  | 6279641100 | 41583970    | 6184089817  | 98.09  | 94.66  | 50.15 | 89.57     |
|         | A-0-5     | 41855012  | 6278251800 | 41552530    | 6194428494  | 98.05  | 94.55  | 50.48 | 90.10     |
| B-0     | B-0-1     | 42578914  | 6386837100 | 42283936    | 6293252539  | 98.09  | 94.60  | 48.85 | 90.60     |
|         | B-0-2     | 42817946  | 6422691900 | 42533742    | 6322785859  | 98.12  | 94.62  | 48.42 | 89.17     |
|         | B-0-3     | 38447676  | 5767151400 | 38178990    | 5673028533  | 98.03  | 94.53  | 49.83 | 89.51     |
|         | B-0-4     | 40280586  | 6042087900 | 40028640    | 5955359982  | 98.14  | 94.65  | 48.66 | 90.43     |
|         | B-0-5     | 44968398  | 6745259700 | 44670392    | 6652825504  | 97.84  | 93.98  | 49.30 | 89.58     |
| A-96-H  | A-96-H-1  | 39565176  | 5934776400 | 39305570    | 5859246008  | 97.54  | 93.31  | 51.62 | 87.80     |
|         | A-96-H-2  | 39975640  | 5996346000 | 39730882    | 5924105673  | 98.00  | 94.41  | 50.67 | 88.67     |
|         | A-96-H-3  | 40744800  | 6111720000 | 40481200    | 6019633831  | 98.06  | 94.51  | 49.23 | 89.22     |
|         | A-96-H-4  | 37871976  | 5680796400 | 37598066    | 5592665814  | 98.09  | 94.66  | 49.55 | 88.76     |
|         | A-96-H-5  | 41067314  | 6160097100 | 40786036    | 6082283100  | 98.08  | 94.60  | 49.35 | 88.98     |
| A-96-L  | A-96-L-1  | 41370544  | 6205581600 | 41069072    | 6105701529  | 97.49  | 93.35  | 50.11 | 87.83     |
|         | A-96-L-2  | 39071592  | 5860738800 | 38809570    | 5791061837  | 97.86  | 94.11  | 50.74 | 88.67     |
|         | A-96-L-3  | 38367876  | 5755181400 | 38128590    | 5675669624  | 98.17  | 94.79  | 49.70 | 88.89     |
|         | A-96-L-4  | 38391096  | 5758664400 | 38145596    | 5673143054  | 97.85  | 94.06  | 51.30 | 88.01     |
|         | A-96-L-5  | 42665708  | 6399856200 | 42340586    | 6308800260  | 97.49  | 93.37  | 49.79 | 88.06     |
| B-96-H  | B-96-H-1  | 39468814  | 5920322100 | 39208520    | 5827470413  | 98.01  | 94.35  | 52.04 | 87.51     |
|         | B-96-H-2  | 42911516  | 6436727400 | 42614184    | 6350671588  | 97.78  | 93.97  | 51.84 | 88.23     |
|         | B-96-H-3  | 46668376  | 7000256400 | 46398788    | 6906155794  | 98.26  | 95.02  | 52.25 | 89.66     |
|         | B-96-H-4  | 40850500  | 6127575000 | 40534394    | 6013581610  | 97.84  | 94.02  | 51.90 | 87.84     |
|         | B-96-H-5  | 40393630  | 6059044500 | 40162534    | 5978810903  | 98.12  | 94.72  | 48.77 | 88.49     |
| B-96-L  | B-96-L-1  | 39954706  | 5993205900 | 39713046    | 5893276112  | 98.18  | 94.76  | 49.47 | 88.81     |
|         | B-96-L-2  | 39934202  | 5990130300 | 39658798    | 5899388860  | 98.07  | 94.49  | 49.31 | 87.50     |
|         | B-96-L-3  | 41489624  | 6223443600 | 41217054    | 6120990723  | 98.14  | 94.70  | 51.05 | 88.10     |
|         | B-96-L-4  | 40853372  | 6128005800 | 40583284    | 6031959608  | 97.87  | 94.19  | 52.72 | 88.55     |
|         | B-96-L-5  | 41543078  | 6231461700 | 41263240    | 6124544246  | 98.13  | 94.69  | 52.66 | 88.61     |
| A-228-H | A-228-H-1 | 37054554  | 5558183100 | 36797424    | 5472368024  | 97.92  | 94.23  | 50.71 | 88.16     |
|         | A-228-H-2 | 43282978  | 6492446700 | 42985804    | 6413144678  | 97.98  | 94.34  | 49.97 | 88.60     |
|         | A-228-H-3 | 42940524  | 6441078600 | 42651258    | 6350883562  | 98.05  | 94.54  | 49.85 | 88.54     |
|         | A-228-H-4 | 40933316  | 6139997400 | 40656968    | 6055356701  | 98.10  | 94.73  | 50.25 | 88.48     |
|         | A-228-H-5 | 41501864  | 6225279600 | 41226078    | 6133952023  | 97.92  | 94.19  | 50.35 | 88.80     |
| A-228-L | A-228-L-1 | 36726756  | 5509013400 | 36504206    | 5425912126  | 98.14  | 94.65  | 49.65 | 89.63     |
|         | A-228-L-2 | 38425550  | 5763832500 | 38154156    | 5679593439  | 97.75  | 93.81  | 49.66 | 88.23     |
|         | A-228-L-3 | 45265998  | 6789899700 | 44942612    | 6673925554  | 97.51  | 93.25  | 50.41 | 88.04     |
|         | A-228-L-4 | 41008050  | 6151207500 | 40720812    | 6040398891  | 97.92  | 94.26  | 51.26 | 88.56     |
|         | A-228-L-5 | 37566842  | 5635026300 | 37321874    | 5541799208  | 98.09  | 94.61  | 49.93 | 88.37     |
| B-228-H | B-228-H-1 | 38738474  | 5810771100 | 38427810    | 5714336482  | 97.74  | 93.89  | 49.93 | 88.21     |
|         | B-228-H-2 | 39188982  | 5878347300 | 38948306    | 5794208390  | 97.86  | 94.11  | 49.63 | 90.83     |
|         | B-228-H-3 | 41996394  | 6299459100 | 41711018    | 6195861796  | 97.56  | 93.47  | 49.73 | 89.98     |
|         | B-228-H-4 | 45648616  | 6847292400 | 45356696    | 6751954544  | 98.05  | 94.51  | 49.73 | 91.08     |
|         | B-228-H-5 | 41171058  | 6175658700 | 40918938    | 6083736708  | 98.22  | 94.91  | 49.44 | 90.36     |
| B-228-L | B-228-L-1 | 37049536  | 5557430400 | 36828298    | 5480118903  | 98.01  | 94.33  | 49.05 | 90.46     |
|         | B-228-L-2 | 40478782  | 6071817300 | 40225314    | 5982695779  | 98.09  | 94.58  | 48.23 | 90.70     |

|           |          |            |          |            |       |       |       |       |
|-----------|----------|------------|----------|------------|-------|-------|-------|-------|
| B-228-L-3 | 36361906 | 5454285900 | 36126966 | 5376053148 | 98.06 | 94.42 | 49.00 | 90.92 |
| B-228-L-4 | 39318404 | 5897760600 | 39069108 | 5810656078 | 98.24 | 94.87 | 49.75 | 91.16 |
| B-228-L-5 | 39784154 | 5967623100 | 39520422 | 5877162714 | 98.10 | 94.64 | 51.14 | 87.36 |

**Supplementary Table S2.** Up-regulated DEGs repeatedly represented across A-96-H, A-96-L, B-96-H and B-96-L groups.

| ID             | Description                                                                     |
|----------------|---------------------------------------------------------------------------------|
| MSTRG.11190    | beta-actin                                                                      |
| MSTRG.11761    | poly [ADP-ribose] polymerase 3-like                                             |
| MSTRG.11887    | Enterin neuropeptide, partial                                                   |
| MSTRG.1433     | alkylglycerol monooxygenase-like                                                |
| MSTRG.15662    | -                                                                               |
| MSTRG.20145    | hedgehog protein                                                                |
| MSTRG.21499    | myelin expression factor 2-like isoform X1                                      |
| MSTRG.26451    | heat shock protein                                                              |
| MSTRG.6971     | apolipoporphins-like                                                            |
| ncbi_113799962 | putative glutamate synthase                                                     |
| ncbi_113800159 | tubulin--tyrosine ligase-like protein 12, transcript variant X1                 |
| ncbi_113800564 | D-3-phosphoglycerate dehydrogenase-like                                         |
| ncbi_113800957 | baculoviral IAP repeat-containing protein 8-like                                |
| ncbi_113801855 | -                                                                               |
| ncbi_113802226 | hsp70-binding protein 1-like                                                    |
| ncbi_113802729 | tyrosine--tRNA ligase, cytoplasmic-like, transcript variant X1                  |
| ncbi_113804713 | probable E3 ubiquitin-protein ligase DTX2, transcript variant X1                |
| ncbi_113805453 | -                                                                               |
| ncbi_113805856 | -                                                                               |
| ncbi_113806043 | heat shock protein HSP 90-alpha, transcript variant X1                          |
| ncbi_113806190 |                                                                                 |
| ncbi_113807145 | alpha,alpha-trehalose-phosphate synthase [UDP-forming]-like                     |
| ncbi_113807440 | -                                                                               |
| ncbi_113807877 | -                                                                               |
| ncbi_113807878 | -                                                                               |
| ncbi_113808177 | -                                                                               |
| ncbi_113808340 | pyrimidodiazepine synthase-like                                                 |
| ncbi_113809516 | protein transport protein Sec61 subunit alpha-like 1                            |
| ncbi_113811176 | proton-coupled folate transporter-like                                          |
| ncbi_113813899 | sodium-dependent phosphate transporter 2-like, transcript variant X1            |
| ncbi_113815713 | -                                                                               |
| ncbi_113815919 | glutathione hydrolase 1 proenzyme-like, transcript variant X1                   |
| ncbi_113816031 | heat shock protein 60A-like                                                     |
| ncbi_113816551 | receptor-mediated endocytosis protein 6 homolog, transcript variant X1          |
| ncbi_113816761 | alkylglycerol monooxygenase-like                                                |
| ncbi_113817008 | uncharacterized LOC113817008                                                    |
| ncbi_113818334 | facilitated trehalose transporter Tret1-like                                    |
| ncbi_113818647 | activator of 90 kDa heat shock protein ATPase homolog 1-like                    |
| ncbi_113818694 | histone deacetylase 4-like                                                      |
| ncbi_113818779 | serine/arginine-rich splicing factor 3-like                                     |
| ncbi_113818927 | endoplasmic reticulum chaperone BiP-like                                        |
| ncbi_113819739 | T-complex protein 1 subunit delta-like                                          |
| ncbi_113819995 | heterogeneous nuclear ribonucleoprotein H3-like                                 |
| ncbi_113820201 | -                                                                               |
| ncbi_113820306 | -                                                                               |
| ncbi_113820689 | protein charybde-like                                                           |
| ncbi_113820751 | poly [ADP-ribose] polymerase 3-like                                             |
| ncbi_113821011 | multidrug resistance protein 1-like                                             |
| ncbi_113821105 | protein disulfide-isomerase A6 homolog                                          |
| ncbi_113821188 | peptide methionine sulfoxide reductase MsrB-like                                |
| ncbi_113822283 | protein timeless-like, transcript variant X1                                    |
| ncbi_113822287 | luc7-like protein 3, transcript variant X1                                      |
| ncbi_113822399 | -                                                                               |
| ncbi_113822400 | sodium- and chloride-dependent GABA transporter ine-like, transcript variant X1 |
| ncbi_113822784 | -                                                                               |

|                |                                                                                |
|----------------|--------------------------------------------------------------------------------|
| ncbi_113824088 | glycogenin-1-like                                                              |
| ncbi_113825716 | eukaryotic translation initiation factor 4 gamma 1-like, transcript variant X1 |
| ncbi_113825862 | alkylglycerol monooxygenase-like                                               |
| ncbi_113826055 | myelin expression factor 2-like                                                |
| ncbi_113827788 | tubulin alpha-3 chain                                                          |
| ncbi_113828369 | DNA-binding protein K10-like                                                   |
| ncbi_113828821 | programmed cell death protein 7-like                                           |
| ncbi_113828837 | tubulin-specific chaperone A-like, transcript variant X1                       |
| ncbi_113830540 | serine/arginine repetitive matrix protein 1-like                               |

**Supplementary Table S3.** Down-regulated DEGs repeatedly represented across A-96-H, A-96-L, B-96-H and B-96-L groups.

| ID             | Description                                                                                    |
|----------------|------------------------------------------------------------------------------------------------|
| MSTRG.10319    | TLC domain-containing protein 2-like [ <i>Penaeus vannamei</i> ]                               |
| MSTRG.16374    | nuclear apoptosis-inducing factor 1-like [ <i>Penaeus monodon</i> ]                            |
| MSTRG.18095    | -                                                                                              |
| MSTRG.18808    | RNA-binding protein 25-like, partial [ <i>Oncorhynchus gorbusha</i> ]                          |
| ncbi_113802762 | DNA repair protein complementing XP-C cells homolog                                            |
| ncbi_113803380 | -                                                                                              |
| ncbi_113804027 | -                                                                                              |
| ncbi_113804952 | ubiquitin carboxyl-terminal hydrolase Usp2-like, transcript variant X1                         |
| ncbi_113805022 | peroxisomal membrane protein 11A-like, transcript variant X1                                   |
| ncbi_113805926 | ribonuclease Y-like, transcript variant X1                                                     |
| ncbi_113806381 | cryptochrome DASH-like, transcript variant X1                                                  |
| ncbi_113806622 | HIG1 domain family member 1C-like, transcript variant X1                                       |
| ncbi_113808549 | RING finger protein 37-like, transcript variant X1                                             |
| ncbi_113813869 | heme-binding protein 2-like                                                                    |
| ncbi_113814209 | TLC domain-containing protein 2-like                                                           |
| ncbi_113816458 | protein fem-1 homolog C-like, transcript variant X1                                            |
| ncbi_113816681 | autophagy-related protein 23-like, transcript variant X1                                       |
| ncbi_113817127 | endochitinase A-like                                                                           |
| ncbi_113817491 | integral membrane protein GPR155-like, transcript variant X1                                   |
| ncbi_113817807 | leucine-rich repeat extensin-like protein 3                                                    |
| ncbi_113817809 | histone-lysine N-methyltransferase, H3 lysine-79 specific-like, transcript variant X1          |
| ncbi_113818101 | succinate dehydrogenase assembly factor 2, mitochondrial-like                                  |
| ncbi_113818731 | -                                                                                              |
| ncbi_113818888 | DNA repair protein complementing XP-C cells homolog                                            |
| ncbi_113820493 | pyruvate dehydrogenase (acetyl-transferring) kinase, mitochondrial-like, transcript variant X1 |
| ncbi_113820707 | protein patched homolog 2-like                                                                 |
| ncbi_113820919 | chitobiosyldiphosphodolichol beta-mannosyltransferase-like, transcript variant X1              |
| ncbi_113821862 | leishmanolysin-like peptidase                                                                  |
| ncbi_113822192 | sodium-coupled monocarboxylate transporter 1-like                                              |
| ncbi_113823528 | metalloreductase STEAP4-like                                                                   |
| ncbi_113824174 | facilitated trehalose transporter Tret1-2 homolog, transcript variant X1                       |
| ncbi_113824444 | probable GPI-anchored adhesin-like protein PGA55, transcript variant X1                        |
| ncbi_113824581 | kelch-like protein 8                                                                           |
| ncbi_113826256 | -                                                                                              |
| ncbi_113826690 | acyl-coenzyme A thioesterase 1-like                                                            |
| ncbi_113827721 | C-factor-like                                                                                  |
| ncbi_113830489 | lysoplasmalogenase-like protein TMEM86A                                                        |

**Supplementary Table S4.** Up-regulated DEGs repeatedly represented across A-228-H, A-228-L, B-228-H and B-228-L groups.

| ID             | Description                                                           |
|----------------|-----------------------------------------------------------------------|
| MSTRG.1433     | alkylglycerol monooxygenase-like [ <i>Penaeus japonicus</i> ]         |
| MSTRG.18698    | atherin-like [ <i>Penaeus vannamei</i> ]                              |
| MSTRG.18705    | CHK1 checkpoint-like protein, partial [ <i>Helicoverpa armigera</i> ] |
| MSTRG.23662    | gamma-glutamyl hydrolase-like [ <i>Penaeus monodon</i> ]              |
| MSTRG.5817     | -                                                                     |
| ncbi_113799962 | putative glutamate synthase [NADPH]                                   |
| ncbi_113803696 | -                                                                     |

|                |                                                               |
|----------------|---------------------------------------------------------------|
| ncbi_113804377 | cyclin-G-associated kinase-like                               |
| ncbi_113805525 | C-type lectin domain family 4 member F-like                   |
| ncbi_113805856 | -                                                             |
| ncbi_113805857 | -                                                             |
| ncbi_113806548 | -                                                             |
| ncbi_113806636 | -                                                             |
| ncbi_113807570 | -                                                             |
| ncbi_113807727 | -                                                             |
| ncbi_113808342 | C-type mannose receptor 2-like                                |
| ncbi_113810052 | -                                                             |
| ncbi_113810057 | peritrophin-1-like                                            |
| ncbi_113811552 | -                                                             |
| ncbi_113812325 | ladderlectin-like                                             |
| ncbi_113816761 | alkylglycerol monooxygenase-like                              |
| ncbi_113817247 | chitotriosidase-1-like                                        |
| ncbi_113817597 | -                                                             |
| ncbi_113817858 | -                                                             |
| ncbi_113820689 | protein charybde-like                                         |
| ncbi_113821705 | -                                                             |
| ncbi_113822187 | solute carrier family 15 member 2-like, transcript variant X1 |
| ncbi_113822657 | -                                                             |
| ncbi_113823073 | -                                                             |
| ncbi_113824399 | -                                                             |
| ncbi_113824401 | -                                                             |
| ncbi_113825862 | alkylglycerol monooxygenase-like                              |
| ncbi_113826006 | -                                                             |

**Supplementary Table S5.** Down-regulated DEGs repeatedly represented across A-228-H, A-228-L, B-228-H and B-228-L groups.

| ID             | Description                                                                 |
|----------------|-----------------------------------------------------------------------------|
| MSTRG.18808    | RNA-binding protein 25-like, partial [ <i>Oncorhynchus gorbuscha</i> ]      |
| MSTRG.194      | protein patched homolog 2-like [ <i>Penaeus vannamei</i> ]                  |
| MSTRG.3402     | Gag-Pol polyprotein [ <i>Chionoecetes opilio</i> ]                          |
| MSTRG.5097     | uncharacterized protein LOC113806516 isoform X4 [ <i>Penaeus vannamei</i> ] |
| MSTRG.8327     | -                                                                           |
| ncbi_113800718 | solute carrier family 43 member 3-like, transcript variant X1               |
| ncbi_113805926 | ribonuclease Y-like, transcript variant X1                                  |
| ncbi_113806381 | cryptochrome DASH-like, transcript variant X1                               |
| ncbi_113806454 | uncharacterized LOC113806454                                                |
| ncbi_113809949 | beta,beta-carotene 15,15'-dioxygenase-like, transcript variant X1           |
| ncbi_113810344 | heme-binding protein 2-like                                                 |
| ncbi_113810377 | heme-binding protein 2-like                                                 |
| ncbi_113812624 | sulfotransferase 1C4-like                                                   |
| ncbi_113813817 | apolipoprotein D-like                                                       |
| ncbi_113813869 | heme-binding protein 2-like                                                 |
| ncbi_113813873 | heme-binding protein 2-like                                                 |
| ncbi_113813874 | heme-binding protein 2-like, transcript variant X1                          |
| ncbi_113813877 | heme-binding protein 2-like                                                 |
| ncbi_113816958 | 2,4-dienoyl-CoA reductase, mitochondrial-like, transcript variant X1        |
| ncbi_113817491 | integral membrane protein GPR155-like, transcript variant X1                |
| ncbi_113818101 | succinate dehydrogenase assembly factor 2, mitochondrial-like               |
| ncbi_113818731 | uncharacterized LOC113818731                                                |
| ncbi_113820605 | uncharacterized LOC113820605                                                |
| ncbi_113820707 | protein patched homolog 2-like                                              |
| ncbi_113821862 | leishmanolysin-like peptidase                                               |
| ncbi_113822024 | uncharacterized LOC113822024, transcript variant X1                         |
| ncbi_113822192 | sodium-coupled monocarboxylate transporter 1-like                           |
| ncbi_113823528 | metalloreductase STEAP4-like                                                |
| ncbi_113824000 | cation diffusion facilitator family protein 1-like, transcript variant X1   |
| ncbi_113824174 | facilitated trehalose transporter Tret1-2 homolog, transcript variant X1    |
| ncbi_113825168 | ATP-binding cassette sub-family D member 2-like                             |
| ncbi_113826256 | uncharacterized LOC113826256, transcript variant X1                         |
| ncbi_113827299 | solute carrier family 22 member 6-A-like                                    |

**Supplementary Table S6.** The GO enrichment analysis of up-regulated DEGs.

| Group   | GO ID      | Description                                                                | Class              |
|---------|------------|----------------------------------------------------------------------------|--------------------|
| A-96-H  | GO:0006457 | protein folding                                                            | Biological Process |
|         | GO:0061077 | chaperone-mediated protein folding                                         | Biological Process |
|         | GO:0044183 | protein binding involved in protein folding                                | Molecular Function |
|         | GO:0005832 | chaperonin-containing T-complex                                            | Cellular Component |
|         | GO:0051082 | unfolded protein binding                                                   | Molecular Function |
|         | GO:0051087 | chaperone binding                                                          | Molecular Function |
|         | GO:0006616 | SRP-dependent cotranslational protein targeting to membrane, translocation | Biological Process |
|         | GO:0034663 | endoplasmic reticulum chaperone complex                                    | Cellular Component |
|         | GO:0002199 | zona pellucida receptor complex                                            | Cellular Component |
|         | GO:0006458 | 'de novo' protein folding                                                  | Biological Process |
| A-96-L  | GO:0006457 | protein folding                                                            | Biological Process |
|         | GO:0061077 | chaperone-mediated protein folding                                         | Biological Process |
|         | GO:0034663 | endoplasmic reticulum chaperone complex                                    | Cellular Component |
|         | GO:0005790 | smooth endoplasmic reticulum                                               | Cellular Component |
|         | GO:0005788 | endoplasmic reticulum lumen                                                | Cellular Component |
|         | GO:0005783 | endoplasmic reticulum                                                      | Cellular Component |
|         | GO:0044432 | endoplasmic reticulum part                                                 | Cellular Component |
|         | GO:0005793 | endoplasmic reticulum-Golgi intermediate compartment                       | Cellular Component |
|         | GO:0042470 | melanosome                                                                 | Cellular Component |
|         | GO:0044183 | protein binding involved in protein folding                                | Molecular Function |
| A-228-H | GO:0022829 | wide pore channel activity                                                 | Molecular Function |
|         | GO:0003823 | antigen binding                                                            | Molecular Function |
|         | GO:0005680 | anaphase-promoting complex                                                 | Cellular Component |
|         | GO:0005921 | gap junction                                                               | Cellular Component |
|         | GO:0000152 | nuclear ubiquitin ligase complex                                           | Cellular Component |
|         | GO:0044449 | contractile fiber part                                                     | Cellular Component |
|         | GO:0016460 | myosin II complex                                                          | Cellular Component |
|         | GO:0005925 | focal adhesion                                                             | Cellular Component |
|         | GO:0090575 | RNA polymerase II transcription factor complex                             | Cellular Component |
|         | GO:0009986 | cell surface                                                               | Cellular Component |
| A-228-L | GO:0008061 | chitin binding                                                             | Molecular Function |
|         | GO:0005518 | collagen binding                                                           | Molecular Function |
|         | GO:0097367 | carbohydrate derivative binding                                            | Molecular Function |
|         | GO:0005576 | extracellular region                                                       | Cellular Component |
|         | GO:0042382 | paraspeckles                                                               | Cellular Component |
|         | GO:0035062 | omega speckle                                                              | Cellular Component |
|         | GO:0050479 | glyceryl-ether monooxygenase activity                                      | Molecular Function |
|         | GO:1990405 | protein antigen binding                                                    | Molecular Function |
|         | GO:0005044 | scavenger receptor activity                                                | Molecular Function |
|         | GO:0030246 | carbohydrate binding                                                       | Molecular Function |
| B-96-H  | GO:0005576 | extracellular region                                                       | Cellular Component |
|         | GO:0043202 | lysosomal lumen                                                            | Cellular Component |
|         | GO:0044421 | extracellular region part                                                  | Cellular Component |
|         | GO:0006457 | protein folding                                                            | Biological Process |
|         | GO:0031204 | posttranslational protein targeting to membrane, translocation             | Biological Process |

|         |            |                                                                          |                    |
|---------|------------|--------------------------------------------------------------------------|--------------------|
|         | GO:0031638 | zymogen activation                                                       | Biological Process |
|         | GO:0097264 | self proteolysis                                                         | Biological Process |
|         | GO:0061750 | acid sphingomyelin phosphodiesterase activity                            | Biological Process |
|         | GO:0035307 | positive regulation of protein dephosphorylation                         | Biological Process |
|         | GO:0035306 | positive regulation of dephosphorylation                                 | Biological Process |
| B-96-L  | GO:0006457 | protein folding                                                          | Biological Process |
|         | GO:0044183 | protein binding involved in protein folding                              | Molecular Function |
|         | GO:0005832 | chaperonin-containing T-complex                                          | Cellular Component |
|         | GO:0030195 | negative regulation of blood coagulation                                 | Biological Process |
|         | GO:1900047 | negative regulation of hemostasis                                        | Biological Process |
|         | GO:0031204 | posttranslational protein targeting to membrane, translocation           | Biological Process |
|         | GO:0050819 | negative regulation of coagulation                                       | Biological Process |
|         | GO:0030193 | regulation of blood coagulation                                          | Biological Process |
|         | GO:1900046 | regulation of hemostasis                                                 | Biological Process |
|         | GO:0050818 | regulation of coagulation                                                | Biological Process |
| B-228-H | GO:0051707 | response to other organism                                               | Biological Process |
|         | GO:0043207 | response to external biotic stimulus                                     | Biological Process |
|         | GO:0009607 | response to biotic stimulus                                              | Biological Process |
|         | GO:0005576 | extracellular region                                                     | Cellular Component |
|         | GO:0052173 | response to defenses of other organism involved in symbiotic interaction | Biological Process |
|         | GO:0052200 | response to host defenses                                                | Biological Process |
|         | GO:0075136 | response to host                                                         | Biological Process |
|         | GO:0051701 | interaction with host                                                    | Biological Process |
|         | GO:0008061 | chitin binding                                                           | Molecular Function |
|         | GO:0030855 | epithelial cell differentiation                                          | Biological Process |
| B-228-L | GO:0042730 | fibrinolysis                                                             | Biological Process |
|         | GO:0030574 | collagen catabolic process                                               | Biological Process |
|         | GO:0044243 | multicellular organism catabolic process                                 | Biological Process |
|         | GO:0046394 | carboxylic acid biosynthetic process                                     | Biological Process |
|         | GO:0016053 | organic acid biosynthetic process                                        | Biological Process |
|         | GO:0033619 | membrane protein proteolysis                                             | Biological Process |
|         | GO:0032963 | collagen metabolic process                                               | Biological Process |
|         | GO:0044259 | multicellular organismal macromolecule metabolic process                 | Biological Process |
|         | GO:0097264 | self proteolysis                                                         | Biological Process |
|         | GO:1901605 | alpha-amino acid metabolic process                                       | Biological Process |

**Supplementary Table S7.** The GO enrichment analysis of down-regulated DEGs.

| Group  | GO ID      | Description                                                | Class              |
|--------|------------|------------------------------------------------------------|--------------------|
| A-96-H | GO:0010917 | negative regulation of mitochondrial membrane potential    | Biological Process |
|        | GO:0045837 | negative regulation of membrane potential                  | Biological Process |
|        | GO:0035794 | positive regulation of mitochondrial membrane permeability | Biological Process |
|        | GO:0010940 | positive regulation of necrotic cell death                 | Biological Process |
|        | GO:0070265 | necrotic cell death                                        | Biological Process |
|        | GO:0010939 | regulation of necrotic cell death                          | Biological Process |
|        | GO:0046902 | regulation of mitochondrial membrane permeability          | Biological Process |
|        | GO:0090559 | regulation of membrane permeability                        | Biological Process |
|        | GO:0035578 | azurophil granule lumen                                    | Cellular Component |
|        | GO:0051881 | regulation of mitochondrial membrane potential             | Biological Process |
| A-96-L | GO:0010917 | negative regulation of mitochondrial membrane potential    | Biological Process |

|         |            |                                                                                       |                    |
|---------|------------|---------------------------------------------------------------------------------------|--------------------|
| A-228-H | GO:0045837 | negative regulation of membrane potential                                             | Biological Process |
|         | GO:0035794 | positive regulation of mitochondrial membrane permeability                            | Biological Process |
|         | GO:0010940 | positive regulation of necrotic cell death                                            | Biological Process |
|         | GO:0010939 | regulation of necrotic cell death                                                     | Biological Process |
|         | GO:0046902 | regulation of mitochondrial membrane permeability                                     | Biological Process |
|         | GO:0090559 | regulation of membrane permeability                                                   | Biological Process |
|         | GO:0070265 | necrotic cell death                                                                   | Biological Process |
|         | GO:0051881 | regulation of mitochondrial membrane potential                                        | Biological Process |
|         | GO:0035578 | azurophil granule lumen                                                               | Cellular Component |
|         | GO:0016491 | oxidoreductase activity                                                               | Molecular Function |
| A-228-L | GO:0048037 | cofactor binding                                                                      | Molecular Function |
|         | GO:0055114 | oxidation-reduction process                                                           | Biological Process |
|         | GO:0050662 | coenzyme binding                                                                      | Molecular Function |
|         | GO:0016616 | oxidoreductase activity, acting on the CH-OH group of donors, NAD or NADP as acceptor | Molecular Function |
|         | GO:0016614 | oxidoreductase activity, acting on CH-OH group of donors                              | Molecular Function |
|         | GO:0010917 | negative regulation of mitochondrial membrane potential                               | Biological Process |
|         | GO:0051186 | cofactor metabolic process                                                            | Biological Process |
|         | GO:0045837 | negative regulation of membrane potential                                             | Biological Process |
|         | GO:0019752 | carboxylic acid metabolic process                                                     | Biological Process |
|         | GO:0010917 | negative regulation of mitochondrial membrane potential                               | Biological Process |
| B-96-H  | GO:0045837 | negative regulation of membrane potential                                             | Biological Process |
|         | GO:0010940 | positive regulation of necrotic cell death                                            | Biological Process |
|         | GO:0010939 | regulation of necrotic cell death                                                     | Biological Process |
|         | GO:0035794 | positive regulation of mitochondrial membrane permeability                            | Biological Process |
|         | GO:0070265 | necrotic cell death                                                                   | Biological Process |
|         | GO:0046902 | regulation of mitochondrial membrane permeability                                     | Biological Process |
|         | GO:0090559 | regulation of membrane permeability                                                   | Biological Process |
|         | GO:0051881 | regulation of mitochondrial membrane potential                                        | Biological Process |
|         | GO:0035578 | azurophil granule lumen                                                               | Cellular Component |
|         | GO:0005739 | mitochondrion                                                                         | Cellular Component |
| B-96-L  | GO:0005737 | cytoplasm                                                                             | Cellular Component |
|         | GO:0005623 | cell                                                                                  | Cellular Component |
|         | GO:0044464 | cell part                                                                             | Cellular Component |
|         | GO:0044444 | cytoplasmic part                                                                      | Cellular Component |
|         | GO:0005622 | intracellular                                                                         | Cellular Component |
|         | GO:0044424 | intracellular part                                                                    | Cellular Component |
|         | GO:0044429 | mitochondrial part                                                                    | Cellular Component |
|         | GO:0044438 | microbody part                                                                        | Cellular Component |
|         | GO:0044439 | peroxisomal part                                                                      | Cellular Component |
|         | GO:0008362 | chitin-based embryonic cuticle biosynthetic process                                   | Biological Process |
|         | GO:0036094 | small molecule binding                                                                | Molecular Function |
|         | GO:0043168 | anion binding                                                                         | Molecular Function |
|         | GO:0000166 | nucleotide binding                                                                    | Molecular Function |
|         | GO:1901265 | nucleoside phosphate binding                                                          | Molecular Function |
|         | GO:1902589 | single-organism organelle organization                                                | Biological Process |
|         | GO:0003904 | deoxyribodipyrimidine photo-lyase activity                                            | Molecular Function |
|         | GO:0004099 | chitin deacetylase activity                                                           | Molecular Function |
|         | GO:0048037 | cofactor binding                                                                      | Molecular Function |

|         |            |                                                            |                    |
|---------|------------|------------------------------------------------------------|--------------------|
| B-228-H | GO:0043167 | ion binding                                                | Molecular Function |
|         | GO:0055114 | oxidation-reduction process                                | Biological Process |
|         | GO:0016491 | oxidoreductase activity                                    | Molecular Function |
|         | GO:0019752 | carboxylic acid metabolic process                          | Biological Process |
|         | GO:0006082 | organic acid metabolic process                             | Biological Process |
|         | GO:0043436 | oxoacid metabolic process                                  | Biological Process |
|         | GO:0048037 | cofactor binding                                           | Molecular Function |
|         | GO:0050662 | coenzyme binding                                           | Molecular Function |
|         | GO:0051186 | cofactor metabolic process                                 | Biological Process |
|         | GO:0044281 | small molecule metabolic process                           | Biological Process |
| B-228-L | GO:0046395 | carboxylic acid catabolic process                          | Biological Process |
|         | GO:0010917 | negative regulation of mitochondrial membrane potential    | Biological Process |
|         | GO:0045837 | negative regulation of membrane potential                  | Biological Process |
|         | GO:0035794 | positive regulation of mitochondrial membrane permeability | Biological Process |
|         | GO:0046902 | regulation of mitochondrial membrane permeability          | Biological Process |
|         | GO:0010940 | positive regulation of necrotic cell death                 | Biological Process |
|         | GO:0090559 | regulation of membrane permeability                        | Biological Process |
|         | GO:0010939 | regulation of necrotic cell death                          | Biological Process |
|         | GO:0070265 | necrotic cell death                                        | Biological Process |
|         | GO:0008362 | chitin-based embryonic cuticle biosynthetic process        | Biological Process |
|         | GO:0035578 | azurophil granule lumen                                    | Cellular Component |

**Supplementary Table S8.** The KEGG enrichment analysis of up-regulated DEGs.

| Group   | Pathway ID | Description                                          |
|---------|------------|------------------------------------------------------|
| A-96-H  | ko04141    | Protein processing in endoplasmic reticulum          |
|         | ko04145    | Phagosome                                            |
|         | ko04512    | ECM-receptor interaction                             |
|         | ko00604    | Glycosphingolipid biosynthesis - ganglio series      |
|         | ko04612    | Antigen processing and presentation                  |
|         | ko03060    | Protein export                                       |
|         | ko00970    | Aminoacyl-tRNA biosynthesis                          |
|         | ko04210    | Apoptosis                                            |
|         | ko00790    | Folate biosynthesis                                  |
|         | ko05134    | Legionellosis                                        |
| A-96-L  | ko04141    | Protein processing in endoplasmic reticulum          |
|         | ko04145    | Phagosome                                            |
|         | ko04210    | Apoptosis                                            |
|         | ko04612    | Antigen processing and presentation                  |
|         | ko03030    | DNA replication                                      |
|         | ko02010    | ABC transporters                                     |
|         | ko00790    | Folate biosynthesis                                  |
|         | ko05100    | Bacterial invasion of epithelial cells               |
|         | ko05134    | Legionellosis                                        |
|         | ko00640    | Propanoate metabolism                                |
| A-228-H | ko05130    | Pathogenic Escherichia coli infection                |
|         | ko05010    | Alzheimer disease                                    |
|         | ko04540    | Gap junction                                         |
|         | ko04933    | AGE-RAGE signaling pathway in diabetic complications |
|         | ko05016    | Huntington disease                                   |



|         |         |                                                      |
|---------|---------|------------------------------------------------------|
| A-228-L | ko04512 | ECM-receptor interaction                             |
|         | ko05134 | Legionellosis                                        |
|         | ko04210 | Apoptosis                                            |
|         | ko05132 | Salmonella infection                                 |
|         | ko00051 | Fructose and mannose metabolism                      |
|         | ko00260 | Glycine, serine and threonine metabolism             |
|         | ko01523 | Antifolate resistance                                |
|         | ko00650 | Butanoate metabolism                                 |
|         | ko00860 | Porphyrin metabolism                                 |
|         | ko00511 | Other glycan degradation                             |
|         | ko00270 | Cysteine and methionine metabolism                   |
|         | ko04612 | Antigen processing and presentation                  |
| B-96-H  | ko04933 | AGE-RAGE signaling pathway in diabetic complications |
|         | ko05134 | Legionellosis                                        |
|         | ko00600 | Sphingolipid metabolism                              |
|         | ko04142 | Lysosome                                             |
|         | ko04915 | Estrogen signaling pathway                           |
|         | ko03060 | Protein export                                       |
|         | ko04141 | Protein processing in endoplasmic reticulum          |
|         | ko04210 | Apoptosis                                            |
|         | ko00600 | Sphingolipid metabolism                              |
|         | ko00500 | Starch and sucrose metabolism                        |
|         | ko04080 | Neuroactive ligand-receptor interaction              |
|         | ko04071 | Sphingolipid signaling pathway                       |
| B-96-L  | ko00531 | Glycosaminoglycan degradation                        |
|         | ko04141 | Protein processing in endoplasmic reticulum          |
|         | ko03060 | Protein export                                       |
|         | ko00500 | Starch and sucrose metabolism                        |
|         | ko04142 | Lysosome                                             |
|         | ko00650 | Butanoate metabolism                                 |
|         | ko00531 | Glycosaminoglycan degradation                        |
|         | ko00410 | beta-Alanine metabolism                              |
|         | ko04210 | Apoptosis                                            |
|         | ko00790 | Folate biosynthesis                                  |
|         | ko00430 | Taurine and hypotaurine metabolism                   |
| B-228-H | ko05130 | Pathogenic Escherichia coli infection                |
|         | ko05134 | Legionellosis                                        |
|         | ko05162 | Measles                                              |
|         | ko05132 | Salmonella infection                                 |
|         | ko05145 | Toxoplasmosis                                        |
|         | ko00010 | Glycolysis / Gluconeogenesis                         |
|         | ko04210 | Apoptosis                                            |
|         | ko01230 | Biosynthesis of amino acids                          |
|         | ko04010 | MAPK signaling pathway                               |
|         | ko05010 | Alzheimer disease                                    |
| B-228-L | ko01230 | Biosynthesis of amino acids                          |
|         | ko00270 | Cysteine and methionine metabolism                   |
|         | ko00670 | One carbon pool by folate                            |
|         | ko01524 | Platinum drug resistance                             |

|         |                                          |
|---------|------------------------------------------|
| ko04115 | p53 signaling pathway                    |
| ko00260 | Glycine, serine and threonine metabolism |
| ko04624 | Toll and Imd signaling pathway           |
| ko04215 | Apoptosis - multiple species             |
| ko04657 | IL-17 signaling pathway                  |
| ko04622 | RIG-I-like receptor signaling pathway    |

**Supplementary Table S9.** The KEGG enrichment analysis of down-regulated DEGs.

| Group   | Pathway ID | Description                                                |
|---------|------------|------------------------------------------------------------|
| A-96-H  | ko05206    | MicroRNAs in cancer                                        |
|         | ko04920    | Adipocytokine signaling pathway                            |
|         | ko00603    | Glycosphingolipid biosynthesis - globo and isoglobo series |
|         | ko00601    | Glycosphingolipid biosynthesis - lacto and neolacto series |
|         | ko04931    | Insulin resistance                                         |
|         | ko04152    | AMPK signaling pathway                                     |
|         | ko04910    | Insulin signaling pathway                                  |
|         | ko04151    | PI3K-Akt signaling pathway                                 |
|         | ko00062    | Fatty acid elongation                                      |
|         | ko04923    | Regulation of lipolysis in adipocytes                      |
| A-96-L  | ko05014    | Amyotrophic lateral sclerosis                              |
|         | ko04920    | Adipocytokine signaling pathway                            |
|         | ko01100    | Metabolic pathways                                         |
|         | ko04918    | Thyroid hormone synthesis                                  |
|         | ko04931    | Insulin resistance                                         |
|         | ko00020    | Citrate cycle (TCA cycle)                                  |
|         | ko04152    | AMPK signaling pathway                                     |
|         | ko04910    | Insulin signaling pathway                                  |
|         | ko00561    | Glycerolipid metabolism                                    |
|         | ko00290    | Valine, leucine and isoleucine biosynthesis                |
| A-228-H | ko01100    | Metabolic pathways                                         |
|         | ko00590    | Arachidonic acid metabolism                                |
|         | ko00750    | Vitamin B6 metabolism                                      |
|         | ko00270    | Cysteine and methionine metabolism                         |
|         | ko04146    | Peroxisome                                                 |
|         | ko00591    | Linoleic acid metabolism                                   |
|         | ko00232    | Caffeine metabolism                                        |
|         | ko00830    | Retinol metabolism                                         |
|         | ko00603    | Glycosphingolipid biosynthesis - globo and isoglobo series |
|         | ko00260    | Glycine, serine and threonine metabolism                   |
| A-228-L | ko04142    | Lysosome                                                   |
|         | ko00062    | Fatty acid elongation                                      |
|         | ko00290    | Valine, leucine and isoleucine biosynthesis                |
|         | ko05033    | Nicotine addiction                                         |
|         | ko04721    | Synaptic vesicle cycle                                     |
|         | ko04979    | Cholesterol metabolism                                     |
|         | ko05014    | Amyotrophic lateral sclerosis                              |
|         | ko00260    | Glycine, serine and threonine metabolism                   |
|         | ko04916    | Melanogenesis                                              |
|         | ko01200    | Carbon metabolism                                          |

|         |         |                                                            |
|---------|---------|------------------------------------------------------------|
| B-96-H  | ko04146 | Peroxisome                                                 |
|         | ko00350 | Tyrosine metabolism                                        |
|         | ko00920 | Sulfur metabolism                                          |
|         | ko01212 | Fatty acid metabolism                                      |
|         | ko00130 | Ubiquinone and other terpenoid-quinone biosynthesis        |
|         | ko02010 | ABC transporters                                           |
|         | ko00750 | Vitamin B6 metabolism                                      |
|         | ko03460 | Fanconi anemia pathway                                     |
|         | ko00071 | Fatty acid degradation                                     |
|         | ko01040 | Biosynthesis of unsaturated fatty acids                    |
| B-96-L  | ko03460 | Fanconi anemia pathway                                     |
|         | ko04137 | Mitophagy - animal                                         |
|         | ko00920 | Sulfur metabolism                                          |
|         | ko03420 | Nucleotide excision repair                                 |
|         | ko00603 | Glycosphingolipid biosynthesis - globo and isoglobo series |
|         | ko00290 | Valine, leucine and isoleucine biosynthesis                |
|         | ko04146 | Peroxisome                                                 |
|         | ko00350 | Tyrosine metabolism                                        |
|         | ko02010 | ABC transporters                                           |
|         | ko00561 | Glycerolipid metabolism                                    |
| B-228-H | ko04146 | Peroxisome                                                 |
|         | ko01100 | Metabolic pathways                                         |
|         | ko00590 | Arachidonic acid metabolism                                |
|         | ko00480 | Glutathione metabolism                                     |
|         | ko00980 | Metabolism of xenobiotics by cytochrome P450               |
|         | ko00410 | beta-Alanine metabolism                                    |
|         | ko00983 | Drug metabolism - other enzymes                            |
|         | ko01212 | Fatty acid metabolism                                      |
|         | ko02010 | ABC transporters                                           |
|         | ko00232 | Caffeine metabolism                                        |
| B-228-L | ko04979 | Cholesterol metabolism                                     |
|         | ko03008 | Ribosome biogenesis in eukaryotes                          |
|         | ko00260 | Glycine, serine and threonine metabolism                   |
|         | ko00920 | Sulfur metabolism                                          |
|         | ko00670 | One carbon pool by folate                                  |
|         | ko05410 | Hypertrophic cardiomyopathy                                |
|         | ko05414 | Dilated cardiomyopathy                                     |
|         | ko03420 | Nucleotide excision repair                                 |
|         | ko00130 | Ubiquinone and other terpenoid-quinone biosynthesis        |
|         | ko00520 | Amino sugar and nucleotide sugar metabolism                |

**Supplementary Table S10.** The GO enrichment analysis of common DEGs across groups.

| Time and expression profile | GO ID      | Description                                 | Class              |
|-----------------------------|------------|---------------------------------------------|--------------------|
| 96 hpi up-regulated         | GO:0006457 | protein folding                             | Biological Process |
|                             | GO:0044183 | protein binding involved in protein folding | Molecular Function |
|                             | GO:0007316 | pole plasm RNA localization                 | Biological Process |
|                             | GO:0019094 | pole plasm mRNA localization                | Biological Process |

|                |            |                                                                                                                                                                                |                    |
|----------------|------------|--------------------------------------------------------------------------------------------------------------------------------------------------------------------------------|--------------------|
|                | GO:0017038 | protein import                                                                                                                                                                 | Biological Process |
|                | GO:0060811 | intracellular mRNA localization involved in anterior/posterior axis specification                                                                                              | Biological Process |
|                | GO:0060810 | intracellular mRNA localization involved in pattern specification process                                                                                                      | Biological Process |
|                | GO:0050479 | glyceryl-ether monooxygenase activity                                                                                                                                          | Molecular Function |
|                | GO:0051087 | chaperone binding                                                                                                                                                              | Molecular Function |
|                | GO:0010035 | response to inorganic substance                                                                                                                                                | Biological Process |
| 96 hpi         | GO:0071942 | XPC complex                                                                                                                                                                    | Cellular Component |
| down-regulated | GO:0000111 | nucleotide-excision repair factor 2 complex                                                                                                                                    | Cellular Component |
|                | GO:1990165 | single-strand break-containing DNA binding                                                                                                                                     | Molecular Function |
|                | GO:0031151 | histone methyltransferase activity (H3-K79 specific)                                                                                                                           | Molecular Function |
|                | GO:0000404 | heteroduplex DNA loop binding                                                                                                                                                  | Molecular Function |
|                | GO:0000405 | bubble DNA binding                                                                                                                                                             | Molecular Function |
|                | GO:0032135 | DNA insertion or deletion binding                                                                                                                                              | Molecular Function |
|                | GO:0003684 | damaged DNA binding                                                                                                                                                            | Molecular Function |
|                | GO:0010777 | meiotic mismatch repair involved in reciprocal meiotic recombination                                                                                                           | Biological Process |
|                | GO:0004578 | chitobiosyldiphosphodolichol beta-mannosyltransferase activity                                                                                                                 | Molecular Function |
| 228 hpi        | GO:0050479 | glyceryl-ether monooxygenase activity                                                                                                                                          | Molecular Function |
| up-regulated   | GO:0016714 | oxidoreductase activity, acting on paired donors, with incorporation or reduction of molecular oxygen, reduced pteridine as one donor, and incorporation of one atom of oxygen | Molecular Function |
|                | GO:0008061 | chitin binding                                                                                                                                                                 | Molecular Function |
|                | GO:0004497 | monooxygenase activity                                                                                                                                                         | Molecular Function |
|                | GO:0005506 | iron ion binding                                                                                                                                                               | Molecular Function |
|                | GO:0016040 | glutamate synthase (NADH) activity                                                                                                                                             | Molecular Function |
|                | GO:0046485 | ether lipid metabolic process                                                                                                                                                  | Biological Process |
|                | GO:0006662 | glycerol ether metabolic process                                                                                                                                               | Biological Process |
|                | GO:0018904 | ether metabolic process                                                                                                                                                        | Biological Process |
|                | GO:0016705 | oxidoreductase activity, acting on paired donors, with incorporation or reduction of molecular oxygen                                                                          | Molecular Function |
| 228 hpi        | GO:0010917 | negative regulation of mitochondrial membrane potential                                                                                                                        | Biological Process |
| down-regulated | GO:0045837 | negative regulation of membrane potential                                                                                                                                      | Biological Process |
|                | GO:0035794 | positive regulation of mitochondrial membrane permeability                                                                                                                     | Biological Process |
|                | GO:0046902 | regulation of mitochondrial membrane permeability                                                                                                                              | Biological Process |
|                | GO:0010940 | positive regulation of necrotic cell death                                                                                                                                     | Biological Process |
|                | GO:0090559 | regulation of membrane permeability                                                                                                                                            | Biological Process |
|                | GO:0010939 | regulation of necrotic cell death                                                                                                                                              | Biological Process |
|                | GO:0070265 | necrotic cell death                                                                                                                                                            | Biological Process |
|                | GO:0051881 | regulation of mitochondrial membrane potential                                                                                                                                 | Biological Process |
|                | GO:0035578 | azurophil granule lumen                                                                                                                                                        | Cellular Component |

**Supplementary Table S11.** The KEGG enrichment analysis of common DEGs across groups.

| Time and expression profile | Pathway ID | Description                                 |
|-----------------------------|------------|---------------------------------------------|
| 96 hpi                      | ko04141    | Protein processing in endoplasmic reticulum |
| up-regulated                | ko05205    | Proteoglycans in cancer                     |
|                             | ko04210    | Apoptosis                                   |
|                             | ko03060    | Protein export                              |

|              |         |                                             |
|--------------|---------|---------------------------------------------|
|              | ko05217 | Basal cell carcinoma                        |
|              | ko04145 | Phagosome                                   |
|              | ko00500 | Starch and sucrose metabolism               |
|              | ko03410 | Base excision repair                        |
|              | ko04340 | Hedgehog signaling pathway                  |
|              | ko04612 | Antigen processing and presentation         |
| 96 hpi       | ko03420 | Nucleotide excision repair                  |
| down-regulat | ko01040 | Biosynthesis of unsaturated fatty acids     |
| ed           | ko00062 | Fatty acid elongation                       |
|              | ko00510 | N-Glycan biosynthesis                       |
|              | ko00310 | Lysine degradation                          |
|              | ko00513 | Various types of N-glycan biosynthesis      |
|              | ko04146 | Peroxisome                                  |
|              | ko04120 | Ubiquitin mediated proteolysis              |
|              | ko04142 | Lysosome                                    |
|              | ko01100 | Metabolic pathways                          |
| 228 hpi      | ko01523 | Antifolate resistance                       |
| up-regulated | ko00790 | Folate biosynthesis                         |
|              | ko00520 | Amino sugar and nucleotide sugar metabolism |
|              | ko01100 | Metabolic pathways                          |
| 228 hpi      | ko04979 | Cholesterol metabolism                      |
| down-regulat | ko04142 | Lysosome                                    |
| ed           | ko05203 | Viral carcinogenesis                        |
|              | ko02010 | ABC transporters                            |
|              | ko03022 | Basal transcription factors                 |
|              | ko03420 | Nucleotide excision repair                  |
|              | ko04146 | Peroxisome                                  |

---
