# Supplementary material for: Comparative Transcriptomic Analysis of WSSV-Challenged Penaeus vannamei with Variable Resistance Levels
Source: MDPI journal article supplement (doi:10.3390/ijms25094961), 2024-05-02
Supplement: s1 [file s1]

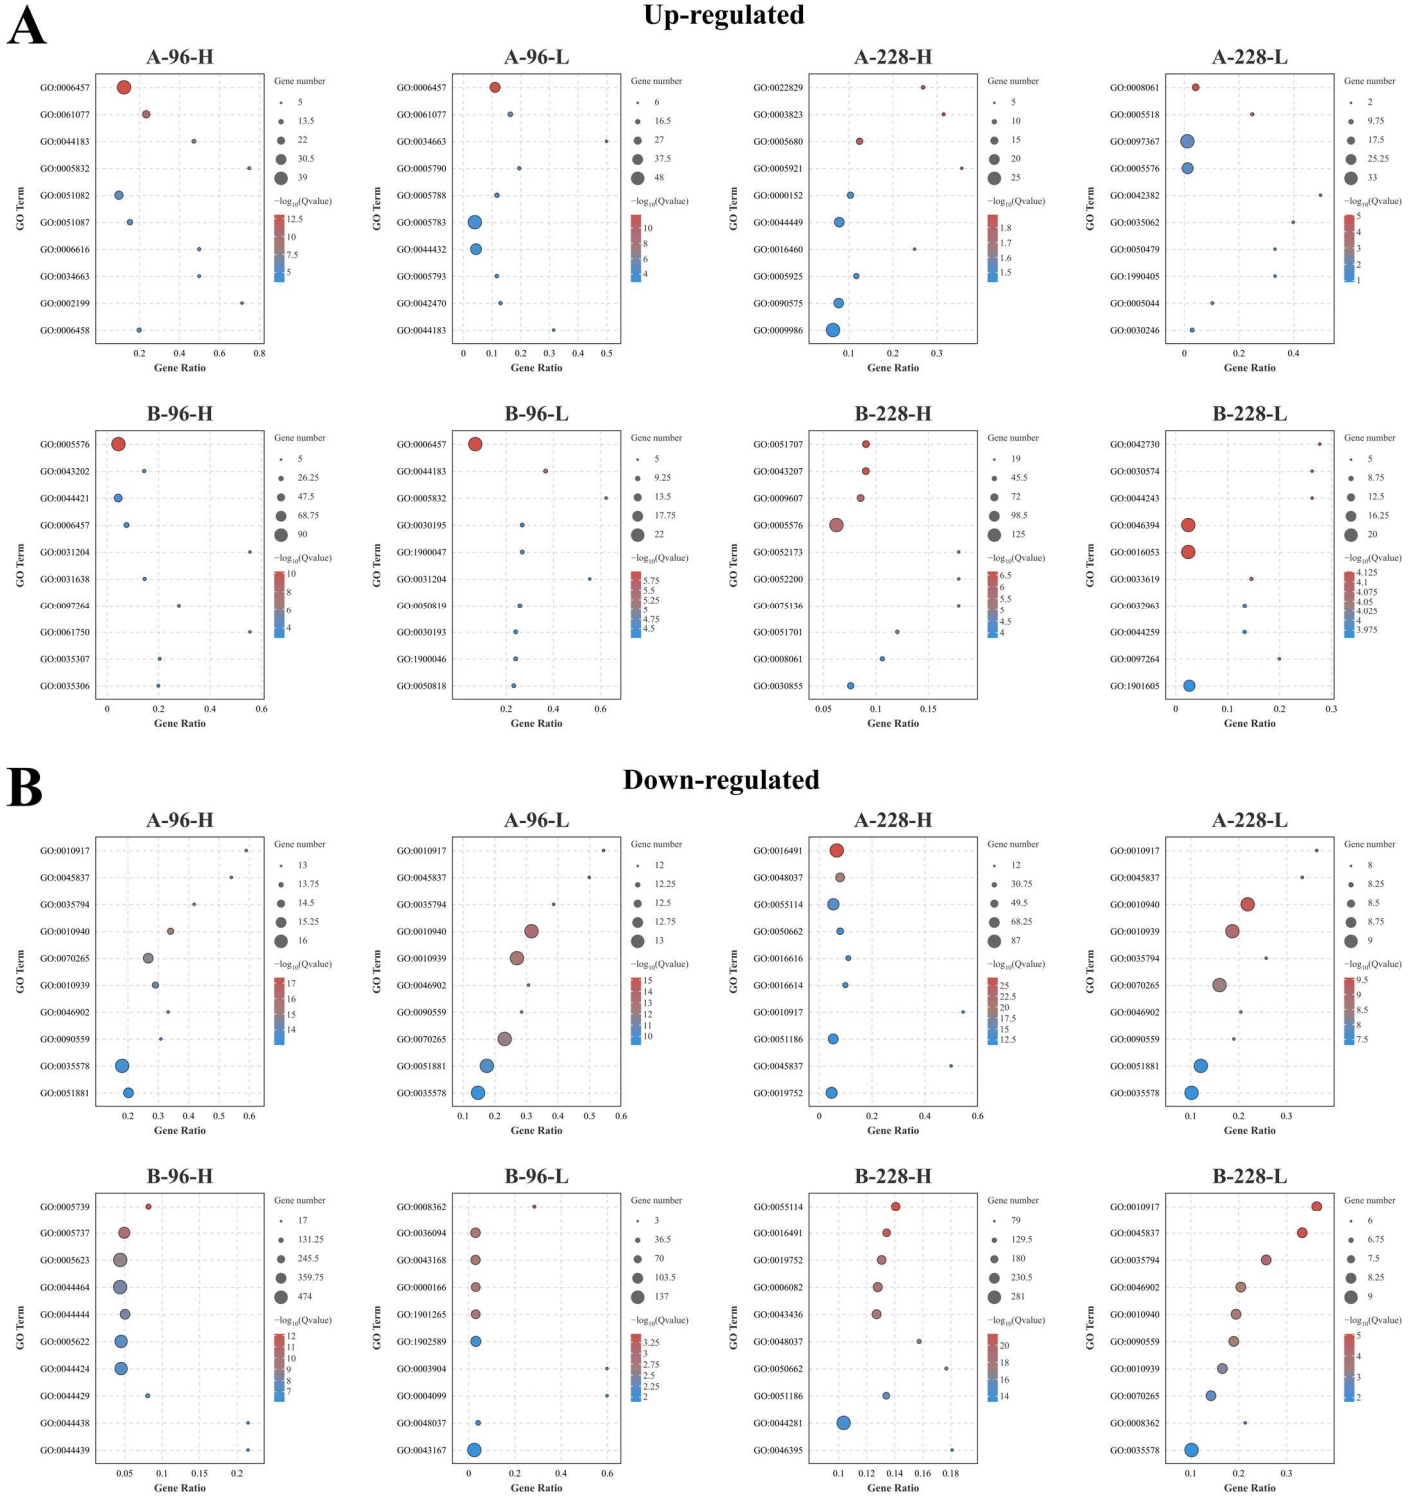

**Supplementary Figure S1.** The GO enrichment analysis of DEGs. The size of the dot plot represents the number of genes.

**(A)** Up-regulated DEGs. **(B)** Down-regulated DEGs.

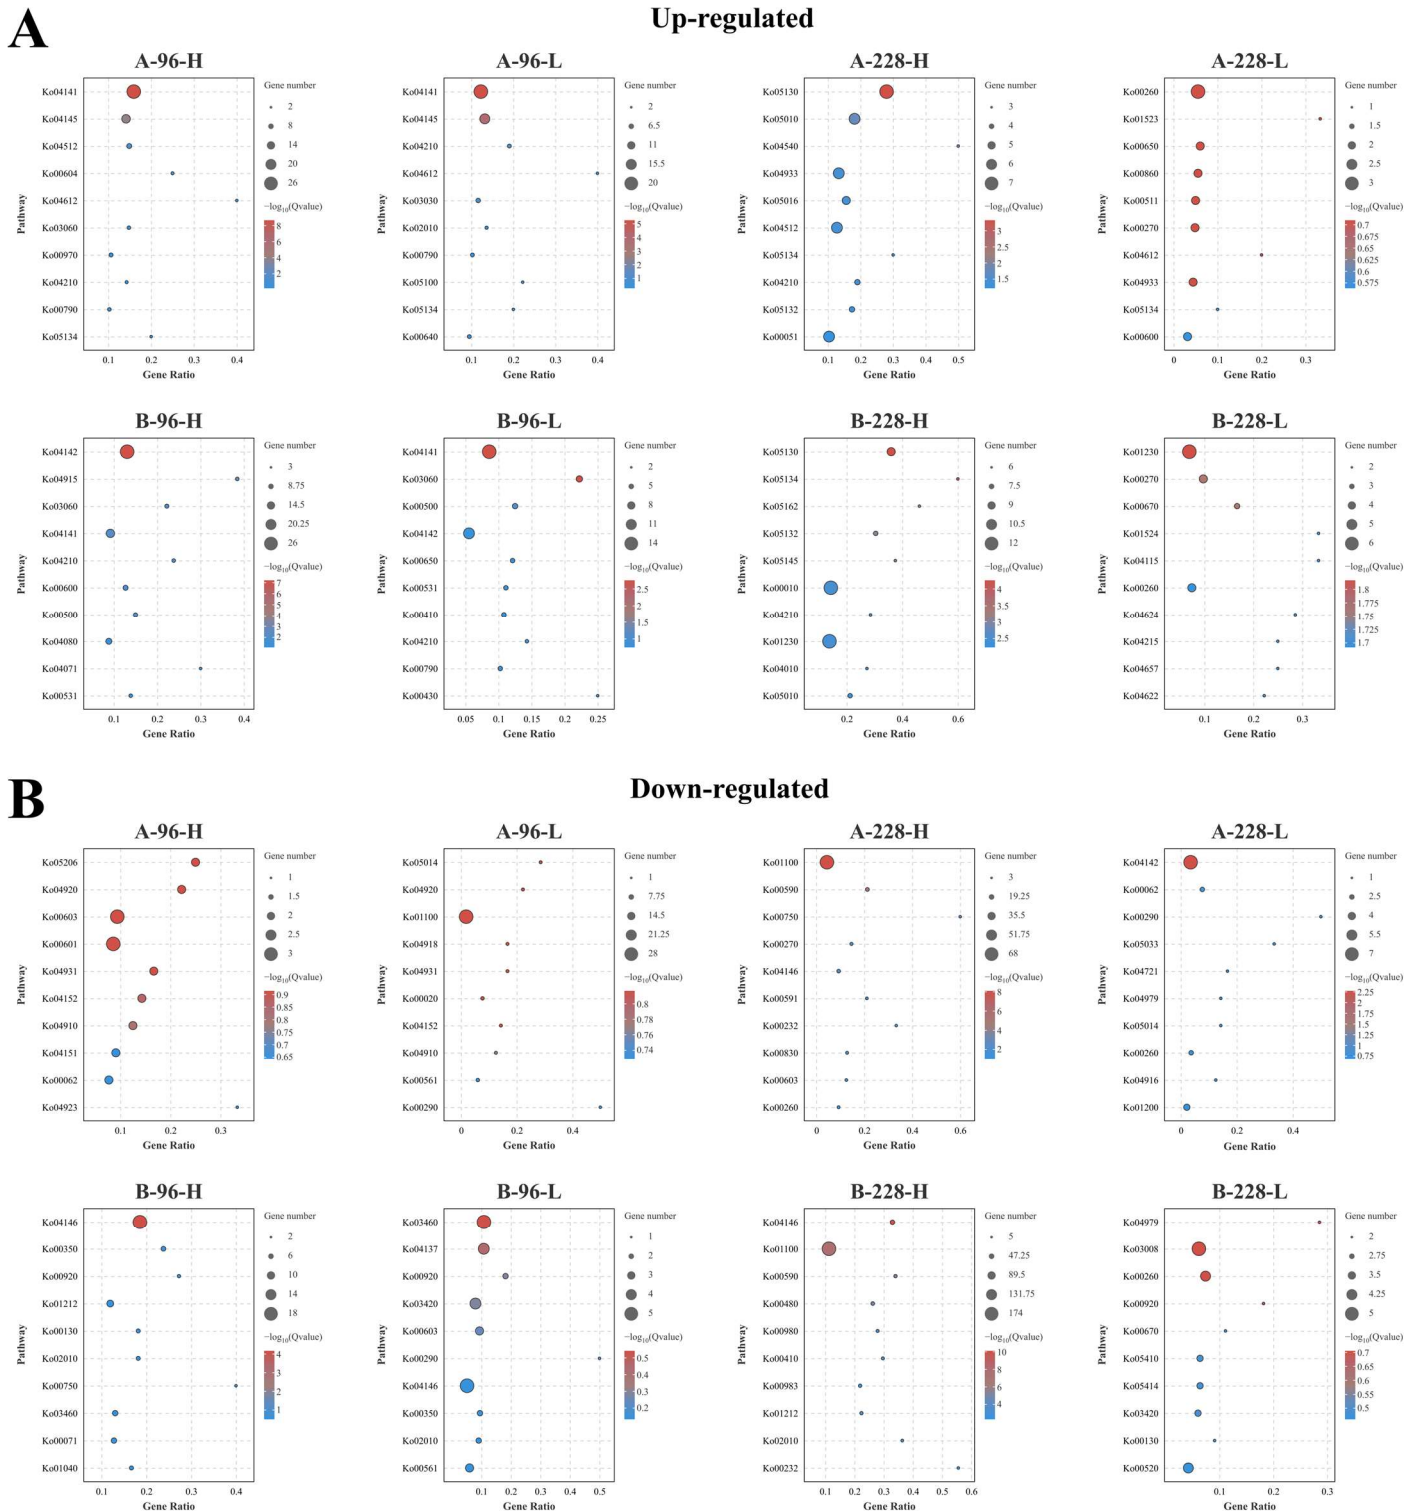

**(A)** Up-regulated DEGs. **(B)** Down-regulated DEGs.
